# Supplementary material
Source: PubMed Central journal article supplement (PMC3154603)
Supplement: supp_00076.2011_tableS1.pdf [file supp_00076.2011_tableS1.pdf]

**TABLE S1.** Composition of Test Diets

| <b>Component</b>                                  | <b>g/kg</b>    |                  |
|---------------------------------------------------|----------------|------------------|
|                                                   | <b>Control</b> | <b>Deficient</b> |
| Vitamin Free Casein                               | 140            | 140              |
| L-Cysteine                                        | 1.8            | 1.8              |
| Corn Starch                                       | 465.692        | 465.721          |
| Maltodextrin                                      | 155.0          | 155.0            |
| Sucrose                                           | 109.75         | 109.75           |
| Soybean Oil                                       | 40.0           | 40.0             |
| Cellulose                                         | 50.0           | 50.0             |
| Choline Bitartrate                                | 2.5            | 2.5              |
| TBHQ, antioxidant                                 | 0.008          | 0.008            |
| AIN-93M Mineral Mix                               | 35.0           | 35.0             |
| Niacin                                            | 0.03           | 0.03             |
| Calcium Pantothenate                              | 0.016          | 0.016            |
| <b>Pyridoxine HCl</b>                             | <b>0.007</b>   | <b>0.0</b>       |
| Thiamin HCl                                       | 0.006          | 0.006            |
| Riboflavin                                        | 0.006          | 0.006            |
| Folic Acid                                        | 0.002          | 0.002            |
| Biotin                                            | 0.0002         | 0.0002           |
| <b>Vitamin B12 (0.1% in mannitol)</b>             | <b>0.0025</b>  | <b>0.0</b>       |
| Vitamin E, DL-alpha tocopheryl acetate (500 IU/g) | 0.15           | 0.15             |
| Vitamin A Palmitate (500,000 IU/g)                | 0.008          | 0.008            |
| Vitamin D3, cholecaliferol (500,000 IU/g)         | 0.002          | 0.002            |
| Vitamin K1, phylloquinone                         | 0.0008         | 0.0008           |
