# Supplementary material
Source: PubMed Central journal article supplement (PMC3154603)
Supplement: supp_00076.2011_tableS2.pdf [file supp_00076.2011_tableS2.pdf]

**TABLE S2.** Concentration of B<sub>6</sub>-B<sub>12</sub> metabolites in plasma.

|                                 | Plasma   |          |          |          | p<0.05 |
|---------------------------------|----------|----------|----------|----------|--------|
|                                 | Con      | Def      | Con+3%   | Def+3%   |        |
| Glycine (μmol/L)                | 189±13   | 287±19   | 194±14   | 243±17   | *      |
| Serine (μmol/L)                 | 137±9    | 118±8    | 125±7    | 109±11   | n/s    |
| Total Methylcitrate<br>(nmol/L) | 158±9    | 160±12   | 133±6    | 128±7    | †      |
| Methylcitrate II (nmol/L)       | 85.8±5.1 | 85.0±6.3 | 73.0±3.5 | 68.5±4.1 | †      |
| Methylcitrate I (nmol/L)        | 72.4±4.1 | 74.6±6.0 | 60.3±3.0 | 59.9±2.9 | †      |
| Methylglycine (nmol/L)          | 629±35   | 834±50   | 618±65   | 709±53   | *      |
| Dimethylglycine<br>(μmol/L)     | 6.2±0.2  | 5.4±0.2  | 6.9±0.7  | 6.4±0.3  | †      |
| α-aminobutyrate<br>(μmol/L)     | 6.2±0.4  | 6.8±0.6  | 8.5±0.9  | 6.4±0.4  | #      |
| Cysteine (μmol/L)               | 229±12   | 217±11   | 160±12   | 175±9    | †      |
| Glutathione (μmol/L)            | 22.7±2.3 | 22.2±1.4 | 18.7±1.4 | 22.4±2.9 | n/s    |

Values mean ± SEM (n=8-10/grp). p<0.05 \*Diet, † DSS, # Diet\*DSS.
