# Supplementary material
Source: PubMed Central journal article supplement (PMC3154603)
Supplement: supp_00076.2011_tableS3.pdf [file supp_00076.2011_tableS3.pdf]

**TABLE S3.** Concentration of B<sub>6</sub>-B<sub>12</sub> metabolites in tissues.

|                              | Colon    |          |          |          | p<0.05 |
|------------------------------|----------|----------|----------|----------|--------|
|                              | Con      | Def      | Con+3%   | Def+3%   |        |
| Cysteine (pmol/mg)           | 76.5±4.6 | 76.9±7.3 | 113±6    | 109±8    | †      |
| Glutathione (nmol/mg)        | 1.4±0.1  | 1.4±0.1  | 1.2±0.1  | 1.3±0.1  | †      |
| Liver                        |          |          |          |          |        |
|                              | Con      | Def      | Con+3%   | Def+3%   | p<0.05 |
| α-aminobutyrate (pmol/mg)    | 70.8±3.3 | 58.3±5.3 | 140±16   | 78.3±6.6 | * † #  |
| Cysteine (pmol/mg)           | 789±25   | 492±24   | 890±56   | 700±39   | * †    |
| Dimethylglycine (pmol/mg)    | 33.1±2.9 | 25.7±0.6 | 29.4±2.2 | 29.4±1.8 | n/s    |
| Glutathione (nmol/mg)        | 6.5±0.4  | 5.2±0.2  | 6.4±0.4  | 5.0±0.4  | *      |
| Glycine (nmol/mg)            | 3.2±0.1  | 3.8±0.1  | 3.6±0.2  | 3.0±0.7  | *      |
| Methylglycine (pmol/mg)      | 19.5±3.4 | 27.0±2.9 | 10.4±1.9 | 15.6±1.8 | * †    |
| Serine (nmol/mg)             | 1.7±0.1  | 1.8±0.1  | 2.1±0.1  | 2.3±0.1  | †      |
| Total Methylcitrate (pmol/g) | 92.1±7.4 | 90.0±6.7 | 80.6±6.1 | 80.4±8.9 | n/s    |

Values mean ± SEM (n=8-10/grp). p<0.05 \*Diet, † DSS, # Diet\*DSS
